# Supplementary material for: Comparative proteome profiling of egg, larva and adult Hermetia illucens (Diptera: Stratiomyidae)
Source: Research Square preprint supplement (doi:10.21203/rs.3.rs-6908850/v1), 2025-06-26
Supplement: Supplementary file 1 [file a2a9d3ab4f609ff1992aadf0.pdf]

1 Comparative proteome profiling of egg, larva and adult  
2 *Hermetia illucens* (Diptera: Stratiomyidae)  
3 Supplementary Information

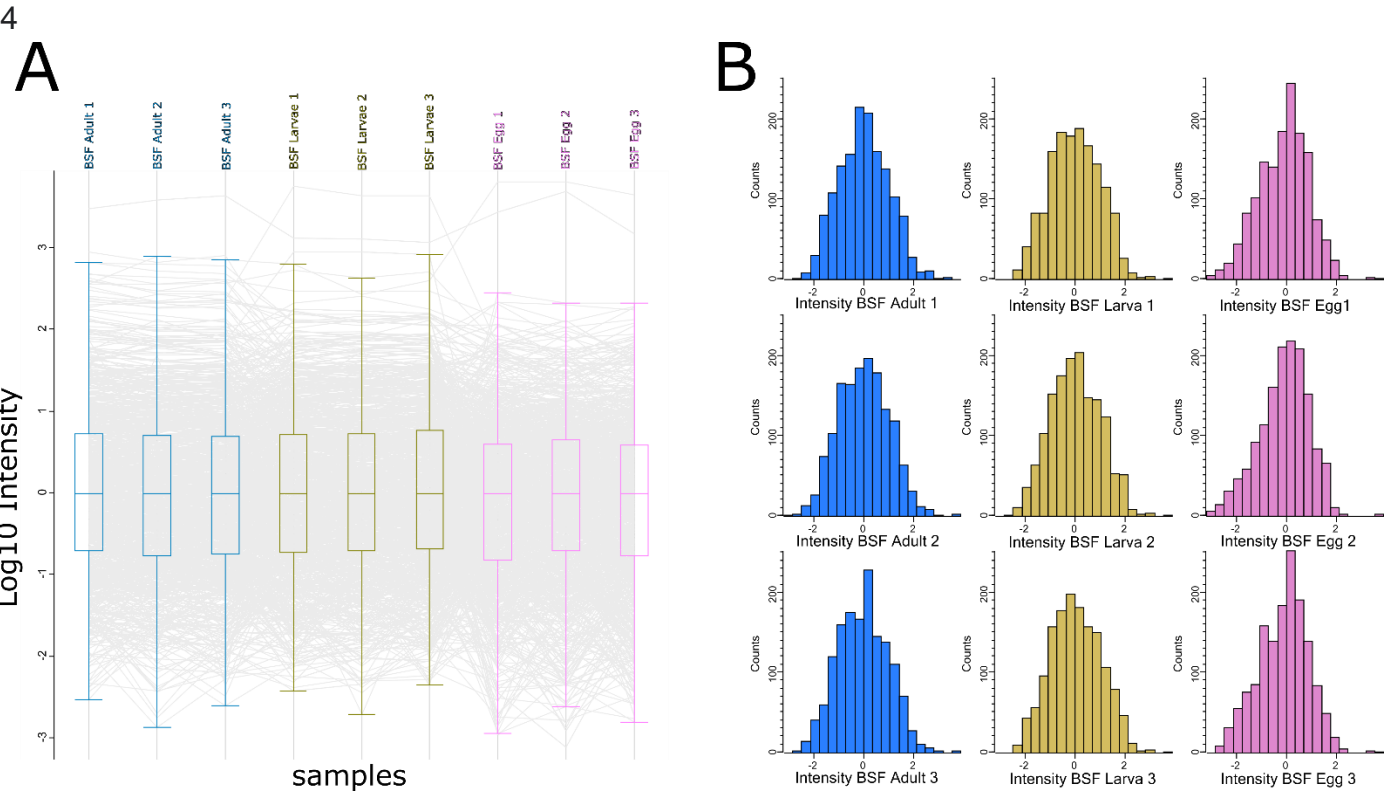

5 Supplementary Figure 1. Exploratory analysis and quality assessment of proteomic  
6 data. (A) Boxplots of normalized  $\log_{10}$  intensity values across all BSF samples, illustrating  
7 sample distribution and variability. (B) Histograms showing the distribution of protein  $\log_{10}$   
8 intensities (X-axis) and corresponding protein counts (Y-axis) for each biological replicate per  
9 developmental stage.

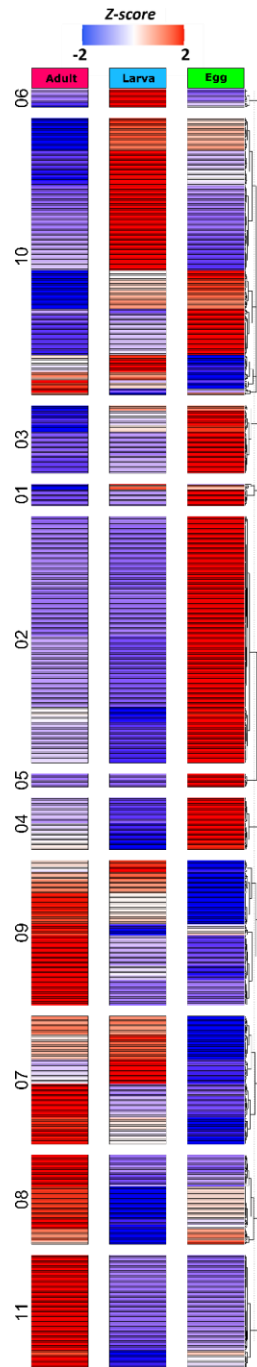

Supplementary Figure 2. Heatmap of all quantifiable proteins across BSF developmental stages. Protein abundance values (Z-score) are shown for adult, larva, and egg samples. Proteins were grouped into clusters using hierarchical clustering based on their expression profiles across all stages.
